# Supplementary material for: Understanding the adoption and use of point-of-care tests in Dutch general practices using multi-criteria decision analysis
Source: Springer Nature journal article supplement (doi:10.1186/s12875-018-0893-4), 2019-01-10
Supplement: MOESM2 [file 16390298]

## **Additional file 2: questions used for semi-structured interviews, and design of analytical hierarchy process session**

This supplementary file contains an overview of the questions asked in the semi-structured interviews, as well as of the design of the analytical hierarchy process session. The interviews were conducted in Dutch. The interview questions (as shown below) were translated to English for the purpose of this publication.

### **Semi-structured interviews (approximate duration: 1 hour)**

In a semi-structured interview (face-to-face or via telephone), the questions as shown below were asked to the participants. In agreement with the participants, the interviews were audio-recorded. The participants were informed that the results will be owned by the University of Twente, will only be used for scientific purposes, and will only be published or reported anonymously.

#### **Questions with regard to the participant:**

1. *What is your gender?*
2. *What is your age?*
3. *What position do you currently hold?*
4. *For how long have you already been working in this position?*
5. *In what type of organization are you employed, and where is it located?*
6. *For general practitioners only: what is the distance to the nearest central laboratory?*
7. *For general practitioners only: which point-of-care tests do you have access to, and do you use these tests frequently?*
8. *For other professionals: with which point-of-care tests are you familiar?*

#### **Agree on the definition of point-of-care testing:**

In the current Dutch guidelines, point-of-care testing within general practices is defined as [1]: “point of care testing (POCT) is the process of initiating, conducting, processing, interpreting, communicating, capturing, and follow-up of a laboratory test, by a healthcare employee, during the process of delivering healthcare to, and in near proximity of the patient.

Urine test strips, haemoglobin, and glucose measurement are classical examples of tests that can be performed point-of-care. D-dimer and C-reactive protein testing are examples of new point-of-care tests who are (gradually) finding their way to primary care.

Our current study only focuses on point-of-care tests performed within healthcare settings (i.e. within the general practice), and therefore does not include self-testing or point-of-care testing at home.

9. *Question for clarification: Do you think that a blood pressure measurement is also a point-of-care test?*

Explanation: no, in the current study we only focus on diagnostic tests that use a sample obtained from the human body (for example, blood urine, saliva).

**Questions with regard to the list of criteria, their definitions, and the range of outcome measures:**

10. *Did you already study the list of criteria and their accompanying definitions? (if not, give the participants time to study this list)*
11. *Are the names of the criteria and their accompanying definitions clear, specific, and unambiguous?*
12. *Do you miss any criteria? If yes, please specify which, and why.*
13. *Do you feel that there is overlap between criteria? If yes, which criteria are this, and why? Do you feel that we could merge these criteria into one criterion?*
14. *Do you feel that there are irrelevant/redundant criteria in this list? If yes, please specify which criteria, and why.*
15. *During previous interviews, the following changes to this list were proposed (the interviewer specifies the most important changes that were proposed during previous interviews). How do you feel about these changes?*
16. *Do you feel that the difference between the criteria 'Technical performance', 'Positive Predictive Value', and 'Negative Predictive Value' is clear? Please explain.*
17. *For the Analytical Hierarchy Process session, it is important to determine a range for every criterion from the list. This may concern absolute numbers (e.g.: Time to perform the test: 4 minutes), or qualitative using a categorical scale (for example, for the criterion 'Connectivity': 'test result is automatically registered in the hospital information system', 'registration of the result requires an additional step (by the general practitioner)', or 'the test result is written down, and manually entered into the hospital information system'. From literature, an initial list of ranges was obtained (which is shown to the participant). Do you have any suggestions for improvement?*
18. *Do you have any other remarks or questions following this interview?*

**References:**

1. Hopstaken, R.M., et al., *Richtlijn: Point of care testing (POCT) in de huisartsenzorg*. 2015.

## Analytical Hierarchy Process (AHP) session *(approximate duration: 3 hours)*

**Part I.** The tables below show the design of the first part of the AHP session, with the 46 pairwise comparisons in each of the four subcriteria (user, organisation, clinical value, and policy making), as well as the comparisons of these four main criteria amongst each other.

| Compare the relative importance of criterion A with criterion B, regarding the implementation of point-of-care (POC) tests in general practices |   |   |   |   |   |   |   |   |   |   |   |   |   |   |   |   |   |                      |
|-------------------------------------------------------------------------------------------------------------------------------------------------|---|---|---|---|---|---|---|---|---|---|---|---|---|---|---|---|---|----------------------|
| USER                                                                                                                                            |   |   |   |   |   |   |   |   |   |   |   |   |   |   |   |   |   |                      |
| extremely - very strong - strong - moderate - equal - moderate -strong - very strong - extremely                                                |   |   |   |   |   |   |   |   |   |   |   |   |   |   |   |   |   |                      |
| Satisfaction patient                                                                                                                            | 9 | 8 | 7 | 6 | 5 | 4 | 3 | 2 | 1 | 2 | 3 | 4 | 5 | 6 | 7 | 8 | 9 | Clarity of procedure |
| Clarity of procedure                                                                                                                            | 9 | 8 | 7 | 6 | 5 | 4 | 3 | 2 | 1 | 2 | 3 | 4 | 5 | 6 | 7 | 8 | 9 | User-friendliness    |
| User-Friendliness                                                                                                                               | 9 | 8 | 7 | 6 | 5 | 4 | 3 | 2 | 1 | 2 | 3 | 4 | 5 | 6 | 7 | 8 | 9 | Test interpretation  |
| Test interpretation                                                                                                                             | 9 | 8 | 7 | 6 | 5 | 4 | 3 | 2 | 1 | 2 | 3 | 4 | 5 | 6 | 7 | 8 | 9 | Turn-around-time     |
| Satisfaction patient                                                                                                                            | 9 | 8 | 7 | 6 | 5 | 4 | 3 | 2 | 1 | 2 | 3 | 4 | 5 | 6 | 7 | 8 | 9 | User-friendliness    |
| Clarity of procedure                                                                                                                            | 9 | 8 | 7 | 6 | 5 | 4 | 3 | 2 | 1 | 2 | 3 | 4 | 5 | 6 | 7 | 8 | 9 | Test interpretation  |
| User-friendliness                                                                                                                               | 9 | 8 | 7 | 6 | 5 | 4 | 3 | 2 | 1 | 2 | 3 | 4 | 5 | 6 | 7 | 8 | 9 | Turn-around-time     |
| Satisfaction patient                                                                                                                            | 9 | 8 | 7 | 6 | 5 | 4 | 3 | 2 | 1 | 2 | 3 | 4 | 5 | 6 | 7 | 8 | 9 | Test interpretation  |
| Clarity of procedure                                                                                                                            | 9 | 8 | 7 | 6 | 5 | 4 | 3 | 2 | 1 | 2 | 3 | 4 | 5 | 6 | 7 | 8 | 9 | Turn-around-time     |
| Satisfaction patient                                                                                                                            | 9 | 8 | 7 | 6 | 5 | 4 | 3 | 2 | 1 | 2 | 3 | 4 | 5 | 6 | 7 | 8 | 9 | Turn-around-time     |

| ORGANISATION                                                                                     |   |   |   |   |   |   |   |   |   |   |   |   |   |   |   |   |   |                                       |
|--------------------------------------------------------------------------------------------------|---|---|---|---|---|---|---|---|---|---|---|---|---|---|---|---|---|---------------------------------------|
| extremely - very strong - strong - moderate - equal - moderate -strong - very strong - extremely |   |   |   |   |   |   |   |   |   |   |   |   |   |   |   |   |   |                                       |
| Frequency of use                                                                                 | 9 | 8 | 7 | 6 | 5 | 4 | 3 | 2 | 1 | 2 | 3 | 4 | 5 | 6 | 7 | 8 | 9 | Room for innovation                   |
| Room for innovation                                                                              | 9 | 8 | 7 | 6 | 5 | 4 | 3 | 2 | 1 | 2 | 3 | 4 | 5 | 6 | 7 | 8 | 9 | Workload                              |
| Workload                                                                                         | 9 | 8 | 7 | 6 | 5 | 4 | 3 | 2 | 1 | 2 | 3 | 4 | 5 | 6 | 7 | 8 | 9 | Support, training and quality control |
| Support, training and quality control                                                            | 9 | 8 | 7 | 6 | 5 | 4 | 3 | 2 | 1 | 2 | 3 | 4 | 5 | 6 | 7 | 8 | 9 | Connectivity                          |
| Frequency of use                                                                                 | 9 | 8 | 7 | 6 | 5 | 4 | 3 | 2 | 1 | 2 | 3 | 4 | 5 | 6 | 7 | 8 | 9 | Workload                              |
| Room for innovation                                                                              | 9 | 8 | 7 | 6 | 5 | 4 | 3 | 2 | 1 | 2 | 3 | 4 | 5 | 6 | 7 | 8 | 9 | Support, training and quality control |
| Workload                                                                                         | 9 | 8 | 7 | 6 | 5 | 4 | 3 | 2 | 1 | 2 | 3 | 4 | 5 | 6 | 7 | 8 | 9 | Connectivity                          |
| Frequency of use                                                                                 | 9 | 8 | 7 | 6 | 5 | 4 | 3 | 2 | 1 | 2 | 3 | 4 | 5 | 6 | 7 | 8 | 9 | Support, training and quality control |
| Room for innovation                                                                              | 9 | 8 | 7 | 6 | 5 | 4 | 3 | 2 | 1 | 2 | 3 | 4 | 5 | 6 | 7 | 8 | 9 | Connectivity                          |
| Frequency of use                                                                                 | 9 | 8 | 7 | 6 | 5 | 4 | 3 | 2 | 1 | 2 | 3 | 4 | 5 | 6 | 7 | 8 | 9 | Connectivity                          |

| <b>CLINICAL VALUE</b>                                                                            |   |   |   |   |   |   |   |   |   |   |   |   |   |   |   |   |   |                           |
|--------------------------------------------------------------------------------------------------|---|---|---|---|---|---|---|---|---|---|---|---|---|---|---|---|---|---------------------------|
| extremely - very strong - strong - moderate - equal - moderate -strong - very strong - extremely |   |   |   |   |   |   |   |   |   |   |   |   |   |   |   |   |   |                           |
| Clinical utility                                                                                 | 9 | 8 | 7 | 6 | 5 | 4 | 3 | 2 | 1 | 2 | 3 | 4 | 5 | 6 | 7 | 8 | 9 | Technical performance     |
| Technical performance                                                                            | 9 | 8 | 7 | 6 | 5 | 4 | 3 | 2 | 1 | 2 | 3 | 4 | 5 | 6 | 7 | 8 | 9 | Negative predictive value |
| Negative predictive value                                                                        | 9 | 8 | 7 | 6 | 5 | 4 | 3 | 2 | 1 | 2 | 3 | 4 | 5 | 6 | 7 | 8 | 9 | Positive predictive value |
| Positive predictive value                                                                        | 9 | 8 | 7 | 6 | 5 | 4 | 3 | 2 | 1 | 2 | 3 | 4 | 5 | 6 | 7 | 8 | 9 | Risks                     |
| Clinical utility                                                                                 | 9 | 8 | 7 | 6 | 5 | 4 | 3 | 2 | 1 | 2 | 3 | 4 | 5 | 6 | 7 | 8 | 9 | Negative predictive value |
| Technical performance                                                                            | 9 | 8 | 7 | 6 | 5 | 4 | 3 | 2 | 1 | 2 | 3 | 4 | 5 | 6 | 7 | 8 | 9 | Positive predictive value |
| Negative predictive value                                                                        | 9 | 8 | 7 | 6 | 5 | 4 | 3 | 2 | 1 | 2 | 3 | 4 | 5 | 6 | 7 | 8 | 9 | Risks                     |
| Clinical utility                                                                                 | 9 | 8 | 7 | 6 | 5 | 4 | 3 | 2 | 1 | 2 | 3 | 4 | 5 | 6 | 7 | 8 | 9 | Positive predictive value |
| Technical performance                                                                            | 9 | 8 | 7 | 6 | 5 | 4 | 3 | 2 | 1 | 2 | 3 | 4 | 5 | 6 | 7 | 8 | 9 | Risks                     |
| Clinical utility                                                                                 | 9 | 8 | 7 | 6 | 5 | 4 | 3 | 2 | 1 | 2 | 3 | 4 | 5 | 6 | 7 | 8 | 9 | Risks                     |

| <b>POLICY MAKING</b>                                                                             |   |   |   |   |   |   |   |   |   |   |   |   |   |   |   |   |   |                     |
|--------------------------------------------------------------------------------------------------|---|---|---|---|---|---|---|---|---|---|---|---|---|---|---|---|---|---------------------|
| extremely - very strong - strong - moderate - equal - moderate -strong - very strong - extremely |   |   |   |   |   |   |   |   |   |   |   |   |   |   |   |   |   |                     |
| Clinical guidelines                                                                              | 9 | 8 | 7 | 6 | 5 | 4 | 3 | 2 | 1 | 2 | 3 | 4 | 5 | 6 | 7 | 8 | 9 | Scientific evidence |
| Scientific evidence                                                                              | 9 | 8 | 7 | 6 | 5 | 4 | 3 | 2 | 1 | 2 | 3 | 4 | 5 | 6 | 7 | 8 | 9 | Reimbursement       |
| Reimbursement                                                                                    | 9 | 8 | 7 | 6 | 5 | 4 | 3 | 2 | 1 | 2 | 3 | 4 | 5 | 6 | 7 | 8 | 9 | Overall costs       |
| Overall costs                                                                                    | 9 | 8 | 7 | 6 | 5 | 4 | 3 | 2 | 1 | 2 | 3 | 4 | 5 | 6 | 7 | 8 | 9 | Legislations        |
| Clinical guidelines                                                                              | 9 | 8 | 7 | 6 | 5 | 4 | 3 | 2 | 1 | 2 | 3 | 4 | 5 | 6 | 7 | 8 | 9 | Reimbursement       |
| Scientific evidence                                                                              | 9 | 8 | 7 | 6 | 5 | 4 | 3 | 2 | 1 | 2 | 3 | 4 | 5 | 6 | 7 | 8 | 9 | Overall costs       |
| Reimbursement                                                                                    | 9 | 8 | 7 | 6 | 5 | 4 | 3 | 2 | 1 | 2 | 3 | 4 | 5 | 6 | 7 | 8 | 9 | Legislations        |
| Clinical guidelines                                                                              | 9 | 8 | 7 | 6 | 5 | 4 | 3 | 2 | 1 | 2 | 3 | 4 | 5 | 6 | 7 | 8 | 9 | Overall costs       |
| Scientific evidence                                                                              | 9 | 8 | 7 | 6 | 5 | 4 | 3 | 2 | 1 | 2 | 3 | 4 | 5 | 6 | 7 | 8 | 9 | Legislations        |
| Clinical guidelines                                                                              | 9 | 8 | 7 | 6 | 5 | 4 | 3 | 2 | 1 | 2 | 3 | 4 | 5 | 6 | 7 | 8 | 9 | Legislations        |

**CATEGORIES**

extremely - very strong - strong - moderate - equal - moderate - strong - very strong - extremely

|                |   |   |   |   |   |   |   |   |   |   |   |   |   |   |   |   |   |                |
|----------------|---|---|---|---|---|---|---|---|---|---|---|---|---|---|---|---|---|----------------|
| User           | 9 | 8 | 7 | 6 | 5 | 4 | 3 | 2 | 1 | 2 | 3 | 4 | 5 | 6 | 7 | 8 | 9 | Organisation   |
| Organisation   | 9 | 8 | 7 | 6 | 5 | 4 | 3 | 2 | 1 | 2 | 3 | 4 | 5 | 6 | 7 | 8 | 9 | Clinical value |
| Clinical value | 9 | 8 | 7 | 6 | 5 | 4 | 3 | 2 | 1 | 2 | 3 | 4 | 5 | 6 | 7 | 8 | 9 | Policy making  |
| User           | 9 | 8 | 7 | 6 | 5 | 4 | 3 | 2 | 1 | 2 | 3 | 4 | 5 | 6 | 7 | 8 | 9 | Clinical value |
| Organisation   | 9 | 8 | 7 | 6 | 5 | 4 | 3 | 2 | 1 | 2 | 3 | 4 | 5 | 6 | 7 | 8 | 9 | Policy making  |
| User           | 9 | 8 | 7 | 6 | 5 | 4 | 3 | 2 | 1 | 2 | 3 | 4 | 5 | 6 | 7 | 8 | 9 | Policy making  |

**Part II.** The tables below show the design of the second part of the AHP session, in which the criteria are scored when the current situation (perform the test in a central laboratory) is compared to the situation in which a point-of-care (POC) analyser is available within the general practice.

| Score criterion 'x' when the current situation (central laboratory test) is compared to the new situation (POC test within general practice). Three examples:<br>1) When considering the criterion 'Satisfaction Patient', which situation do you then prefer, and to what extent?<br>2) Does the current 'Room for innovation' within the general practice stimulate the use of a central laboratory test or a POC test?<br>3) Does the criterion 'Clarity of procedure' stimulate the use of a central laboratory test or a POC test? (compare the (entire) procedure performed in case of a POC test, with the situation in which a test is requested at a central laboratory, and the processing of the results once they are received). |                           |   |   |   |   |   |   |   |   |   |   |   |   |   |   |   |   |   |                                  |
|----------------------------------------------------------------------------------------------------------------------------------------------------------------------------------------------------------------------------------------------------------------------------------------------------------------------------------------------------------------------------------------------------------------------------------------------------------------------------------------------------------------------------------------------------------------------------------------------------------------------------------------------------------------------------------------------------------------------------------------------|---------------------------|---|---|---|---|---|---|---|---|---|---|---|---|---|---|---|---|---|----------------------------------|
| <b>C-reactive protein (CRP) test</b>                                                                                                                                                                                                                                                                                                                                                                                                                                                                                                                                                                                                                                                                                                         |                           |   |   |   |   |   |   |   |   |   |   |   |   |   |   |   |   |   |                                  |
| extremely - very strong - strong - moderate - equal - moderate -strong - very strong - extremely                                                                                                                                                                                                                                                                                                                                                                                                                                                                                                                                                                                                                                             |                           |   |   |   |   |   |   |   |   |   |   |   |   |   |   |   |   |   |                                  |
| <b>USER</b>                                                                                                                                                                                                                                                                                                                                                                                                                                                                                                                                                                                                                                                                                                                                  |                           |   |   |   |   |   |   |   |   |   |   |   |   |   |   |   |   |   |                                  |
| Satisfaction patient                                                                                                                                                                                                                                                                                                                                                                                                                                                                                                                                                                                                                                                                                                                         | CRP reference test at lab | 9 | 8 | 7 | 6 | 5 | 4 | 3 | 2 | 1 | 2 | 3 | 4 | 5 | 6 | 7 | 8 | 9 | CRP POC test at general practice |
| Clarity of procedure                                                                                                                                                                                                                                                                                                                                                                                                                                                                                                                                                                                                                                                                                                                         | CRP reference test at lab | 9 | 8 | 7 | 6 | 5 | 4 | 3 | 2 | 1 | 2 | 3 | 4 | 5 | 6 | 7 | 8 | 9 | CRP POC test at general practice |
| User-friendliness                                                                                                                                                                                                                                                                                                                                                                                                                                                                                                                                                                                                                                                                                                                            | CRP reference test at lab | 9 | 8 | 7 | 6 | 5 | 4 | 3 | 2 | 1 | 2 | 3 | 4 | 5 | 6 | 7 | 8 | 9 | CRP POC test at general practice |
| Test interpretation                                                                                                                                                                                                                                                                                                                                                                                                                                                                                                                                                                                                                                                                                                                          | CRP reference test at lab | 9 | 8 | 7 | 6 | 5 | 4 | 3 | 2 | 1 | 2 | 3 | 4 | 5 | 6 | 7 | 8 | 9 | CRP POC test at general practice |
| Turn-around-time                                                                                                                                                                                                                                                                                                                                                                                                                                                                                                                                                                                                                                                                                                                             | CRP reference test at lab | 9 | 8 | 7 | 6 | 5 | 4 | 3 | 2 | 1 | 2 | 3 | 4 | 5 | 6 | 7 | 8 | 9 | CRP POC test at general practice |
| <b>ORGANISATION</b>                                                                                                                                                                                                                                                                                                                                                                                                                                                                                                                                                                                                                                                                                                                          |                           |   |   |   |   |   |   |   |   |   |   |   |   |   |   |   |   |   |                                  |
| Frequency of use                                                                                                                                                                                                                                                                                                                                                                                                                                                                                                                                                                                                                                                                                                                             | CRP reference test at lab | 9 | 8 | 7 | 6 | 5 | 4 | 3 | 2 | 1 | 2 | 3 | 4 | 5 | 6 | 7 | 8 | 9 | CRP POC test at general practice |
| Room for innovation                                                                                                                                                                                                                                                                                                                                                                                                                                                                                                                                                                                                                                                                                                                          | CRP reference test at lab | 9 | 8 | 7 | 6 | 5 | 4 | 3 | 2 | 1 | 2 | 3 | 4 | 5 | 6 | 7 | 8 | 9 | CRP POC test at general practice |
| Workload                                                                                                                                                                                                                                                                                                                                                                                                                                                                                                                                                                                                                                                                                                                                     | CRP reference test at lab | 9 | 8 | 7 | 6 | 5 | 4 | 3 | 2 | 1 | 2 | 3 | 4 | 5 | 6 | 7 | 8 | 9 | CRP POC test at general practice |
| Support, training, qc                                                                                                                                                                                                                                                                                                                                                                                                                                                                                                                                                                                                                                                                                                                        | CRP reference test at lab | 9 | 8 | 7 | 6 | 5 | 4 | 3 | 2 | 1 | 2 | 3 | 4 | 5 | 6 | 7 | 8 | 9 | CRP POC test at general practice |
| Connectivity                                                                                                                                                                                                                                                                                                                                                                                                                                                                                                                                                                                                                                                                                                                                 | CRP reference test at lab | 9 | 8 | 7 | 6 | 5 | 4 | 3 | 2 | 1 | 2 | 3 | 4 | 5 | 6 | 7 | 8 | 9 | CRP POC test at general practice |
| <b>CLINICAL VALUE</b>                                                                                                                                                                                                                                                                                                                                                                                                                                                                                                                                                                                                                                                                                                                        |                           |   |   |   |   |   |   |   |   |   |   |   |   |   |   |   |   |   |                                  |
| Clinical utility                                                                                                                                                                                                                                                                                                                                                                                                                                                                                                                                                                                                                                                                                                                             | CRP reference test at lab | 9 | 8 | 7 | 6 | 5 | 4 | 3 | 2 | 1 | 2 | 3 | 4 | 5 | 6 | 7 | 8 | 9 | CRP POC test at general practice |
| Technical performance                                                                                                                                                                                                                                                                                                                                                                                                                                                                                                                                                                                                                                                                                                                        | CRP reference test at lab | 9 | 8 | 7 | 6 | 5 | 4 | 3 | 2 | 1 | 2 | 3 | 4 | 5 | 6 | 7 | 8 | 9 | CRP POC test at general practice |
| Negative predictive value                                                                                                                                                                                                                                                                                                                                                                                                                                                                                                                                                                                                                                                                                                                    | CRP reference test at lab | 9 | 8 | 7 | 6 | 5 | 4 | 3 | 2 | 1 | 2 | 3 | 4 | 5 | 6 | 7 | 8 | 9 | CRP POC test at general practice |
| Positive predictive value                                                                                                                                                                                                                                                                                                                                                                                                                                                                                                                                                                                                                                                                                                                    | CRP reference test at lab | 9 | 8 | 7 | 6 | 5 | 4 | 3 | 2 | 1 | 2 | 3 | 4 | 5 | 6 | 7 | 8 | 9 | CRP POC test at general practice |
| Risks                                                                                                                                                                                                                                                                                                                                                                                                                                                                                                                                                                                                                                                                                                                                        | CRP reference test at lab | 9 | 8 | 7 | 6 | 5 | 4 | 3 | 2 | 1 | 2 | 3 | 4 | 5 | 6 | 7 | 8 | 9 | CRP POC test at general practice |
| <b>POLICY MAKING</b>                                                                                                                                                                                                                                                                                                                                                                                                                                                                                                                                                                                                                                                                                                                         |                           |   |   |   |   |   |   |   |   |   |   |   |   |   |   |   |   |   |                                  |
| Clinical guidelines                                                                                                                                                                                                                                                                                                                                                                                                                                                                                                                                                                                                                                                                                                                          | CRP reference test at lab | 9 | 8 | 7 | 6 | 5 | 4 | 3 | 2 | 1 | 2 | 3 | 4 | 5 | 6 | 7 | 8 | 9 | CRP POC test at general practice |
| Scientific evidence                                                                                                                                                                                                                                                                                                                                                                                                                                                                                                                                                                                                                                                                                                                          | CRP reference test at lab | 9 | 8 | 7 | 6 | 5 | 4 | 3 | 2 | 1 | 2 | 3 | 4 | 5 | 6 | 7 | 8 | 9 | CRP POC test at general practice |
| Reimbursement                                                                                                                                                                                                                                                                                                                                                                                                                                                                                                                                                                                                                                                                                                                                | CRP reference test at lab | 9 | 8 | 7 | 6 | 5 | 4 | 3 | 2 | 1 | 2 | 3 | 4 | 5 | 6 | 7 | 8 | 9 | CRP POC test at general practice |
| Overall costs                                                                                                                                                                                                                                                                                                                                                                                                                                                                                                                                                                                                                                                                                                                                | CRP reference test at lab | 9 | 8 | 7 | 6 | 5 | 4 | 3 | 2 | 1 | 2 | 3 | 4 | 5 | 6 | 7 | 8 | 9 | CRP POC test at general practice |
| Legislations                                                                                                                                                                                                                                                                                                                                                                                                                                                                                                                                                                                                                                                                                                                                 | CRP reference test at lab | 9 | 8 | 7 | 6 | 5 | 4 | 3 | 2 | 1 | 2 | 3 | 4 | 5 | 6 | 7 | 8 | 9 | CRP POC test at general practice |

## Glycated haemoglobin (HbA1c)

extremely - very strong - strong - moderate - equal - moderate -strong - very strong - extremely

| <b>USER</b>               |                          |   |   |   |   |   |   |   |   |   |   |   |   |   |   |   |   |   |                                    |
|---------------------------|--------------------------|---|---|---|---|---|---|---|---|---|---|---|---|---|---|---|---|---|------------------------------------|
| Satisfaction patient      | HbA1c reference test lab | 9 | 8 | 7 | 6 | 5 | 4 | 3 | 2 | 1 | 2 | 3 | 4 | 5 | 6 | 7 | 8 | 9 | HbA1c POC test at general practice |
| Clarity of procedure      | HbA1c reference test lab | 9 | 8 | 7 | 6 | 5 | 4 | 3 | 2 | 1 | 2 | 3 | 4 | 5 | 6 | 7 | 8 | 9 | HbA1c POC test at general practice |
| User-friendliness         | HbA1c reference test lab | 9 | 8 | 7 | 6 | 5 | 4 | 3 | 2 | 1 | 2 | 3 | 4 | 5 | 6 | 7 | 8 | 9 | HbA1c POC test at general practice |
| Test interpretation       | HbA1c reference test lab | 9 | 8 | 7 | 6 | 5 | 4 | 3 | 2 | 1 | 2 | 3 | 4 | 5 | 6 | 7 | 8 | 9 | HbA1c POC test at general practice |
| Turn-around-time          | HbA1c reference test lab | 9 | 8 | 7 | 6 | 5 | 4 | 3 | 2 | 1 | 2 | 3 | 4 | 5 | 6 | 7 | 8 | 9 | HbA1c POC test at general practice |
| <b>ORGANISATION</b>       |                          |   |   |   |   |   |   |   |   |   |   |   |   |   |   |   |   |   |                                    |
| Frequency of use          | HbA1c reference test lab | 9 | 8 | 7 | 6 | 5 | 4 | 3 | 2 | 1 | 2 | 3 | 4 | 5 | 6 | 7 | 8 | 9 | HbA1c POC test at general practice |
| Room for innovation       | HbA1c reference test lab | 9 | 8 | 7 | 6 | 5 | 4 | 3 | 2 | 1 | 2 | 3 | 4 | 5 | 6 | 7 | 8 | 9 | HbA1c POC test at general practice |
| Workload                  | HbA1c reference test lab | 9 | 8 | 7 | 6 | 5 | 4 | 3 | 2 | 1 | 2 | 3 | 4 | 5 | 6 | 7 | 8 | 9 | HbA1c POC test at general practice |
| Support, training, qc     | HbA1c reference test lab | 9 | 8 | 7 | 6 | 5 | 4 | 3 | 2 | 1 | 2 | 3 | 4 | 5 | 6 | 7 | 8 | 9 | HbA1c POC test at general practice |
| Connectivity              | HbA1c reference test lab | 9 | 8 | 7 | 6 | 5 | 4 | 3 | 2 | 1 | 2 | 3 | 4 | 5 | 6 | 7 | 8 | 9 | HbA1c POC test at general practice |
| <b>CLINICAL VALUE</b>     |                          |   |   |   |   |   |   |   |   |   |   |   |   |   |   |   |   |   |                                    |
| Clinical utility          | HbA1c reference test lab | 9 | 8 | 7 | 6 | 5 | 4 | 3 | 2 | 1 | 2 | 3 | 4 | 5 | 6 | 7 | 8 | 9 | HbA1c POC test at general practice |
| Technical performance     | HbA1c reference test lab | 9 | 8 | 7 | 6 | 5 | 4 | 3 | 2 | 1 | 2 | 3 | 4 | 5 | 6 | 7 | 8 | 9 | HbA1c POC test at general practice |
| Negative predictive value | HbA1c reference test lab | 9 | 8 | 7 | 6 | 5 | 4 | 3 | 2 | 1 | 2 | 3 | 4 | 5 | 6 | 7 | 8 | 9 | HbA1c POC test at general practice |
| Positive predictive value | HbA1c reference test lab | 9 | 8 | 7 | 6 | 5 | 4 | 3 | 2 | 1 | 2 | 3 | 4 | 5 | 6 | 7 | 8 | 9 | HbA1c POC test at general practice |
| Risks                     | HbA1c reference test lab | 9 | 8 | 7 | 6 | 5 | 4 | 3 | 2 | 1 | 2 | 3 | 4 | 5 | 6 | 7 | 8 | 9 | HbA1c POC test at general practice |
| <b>POLICY MAKING</b>      |                          |   |   |   |   |   |   |   |   |   |   |   |   |   |   |   |   |   |                                    |
| Clinical guidelines       | HbA1c reference test lab | 9 | 8 | 7 | 6 | 5 | 4 | 3 | 2 | 1 | 2 | 3 | 4 | 5 | 6 | 7 | 8 | 9 | HbA1c POC test at general practice |
| Scientific evidence       | HbA1c reference test lab | 9 | 8 | 7 | 6 | 5 | 4 | 3 | 2 | 1 | 2 | 3 | 4 | 5 | 6 | 7 | 8 | 9 | HbA1c POC test at general practice |
| Reimbursement             | HbA1c reference test lab | 9 | 8 | 7 | 6 | 5 | 4 | 3 | 2 | 1 | 2 | 3 | 4 | 5 | 6 | 7 | 8 | 9 | HbA1c POC test at general practice |
| Overall costs             | HbA1c reference test lab | 9 | 8 | 7 | 6 | 5 | 4 | 3 | 2 | 1 | 2 | 3 | 4 | 5 | 6 | 7 | 8 | 9 | HbA1c POC test at general practice |
| Legislation               | HbA1c reference test lab | 9 | 8 | 7 | 6 | 5 | 4 | 3 | 2 | 1 | 2 | 3 | 4 | 5 | 6 | 7 | 8 | 9 | HbA1c POC test at general practice |
